# Supplementary material for: Respiratory Symptoms and Skin Sick Building Syndrome among Office Workers at University Hospital, Chiang Mai, Thailand: Associations with Indoor Air Quality, AIRMED Project
Source: MDPI journal article supplement (doi:10.3390/ijerph191710850), 2022-08-31
Supplement: s1 [file s1]

**Table S1.** The comparison of IAQ parameter levels by types of air-conditioning (split-type, centralized type, and both types)

| Parameters                                         | F-statistic | <i>p</i> -value |
|----------------------------------------------------|-------------|-----------------|
| <b>Thermal comfort parameters</b>                  |             |                 |
| Air temperature )°C(                               | 1.102       | 0.350           |
| Relative humidity )%(                              | 1.403       | 0.267           |
| Air movement )m/s(                                 | 1.017       | 0.378           |
| <b>Chemical parameters</b>                         |             |                 |
| Carbon dioxide )ppm(                               | 0.468       | 0.633           |
| Formaldehyde )ppm( <sup>a</sup>                    | 3.449       | 0.178           |
| Carbon monoxide )ppm(                              | N/A         | N/A             |
| TVOC )ppb(                                         | N/A         | N/A             |
| <b>Particulate matter</b>                          |             |                 |
| PM2.5 )µg/m <sup>3</sup> (                         | 2.265       | 0.128           |
| <b>Biological parameters</b>                       |             |                 |
| Total viable bacterial count )CFU/m <sup>3</sup> ( | 0.476       | 0.628           |

*p*-value was obtained by ANOVA test, except <sup>a</sup> non-parametric variable, the statistical analysis was performed using Rank-sum test (X<sup>2</sup> statistic).
